# Supplementary material
Source: PubMed Central journal article supplement (PMC4885135)
Supplement: supp_gmw001_gmw001supp_fig1.pdf [file supp_gmw001_gmw001supp_fig1.pdf]

Supplementary Figure S1.

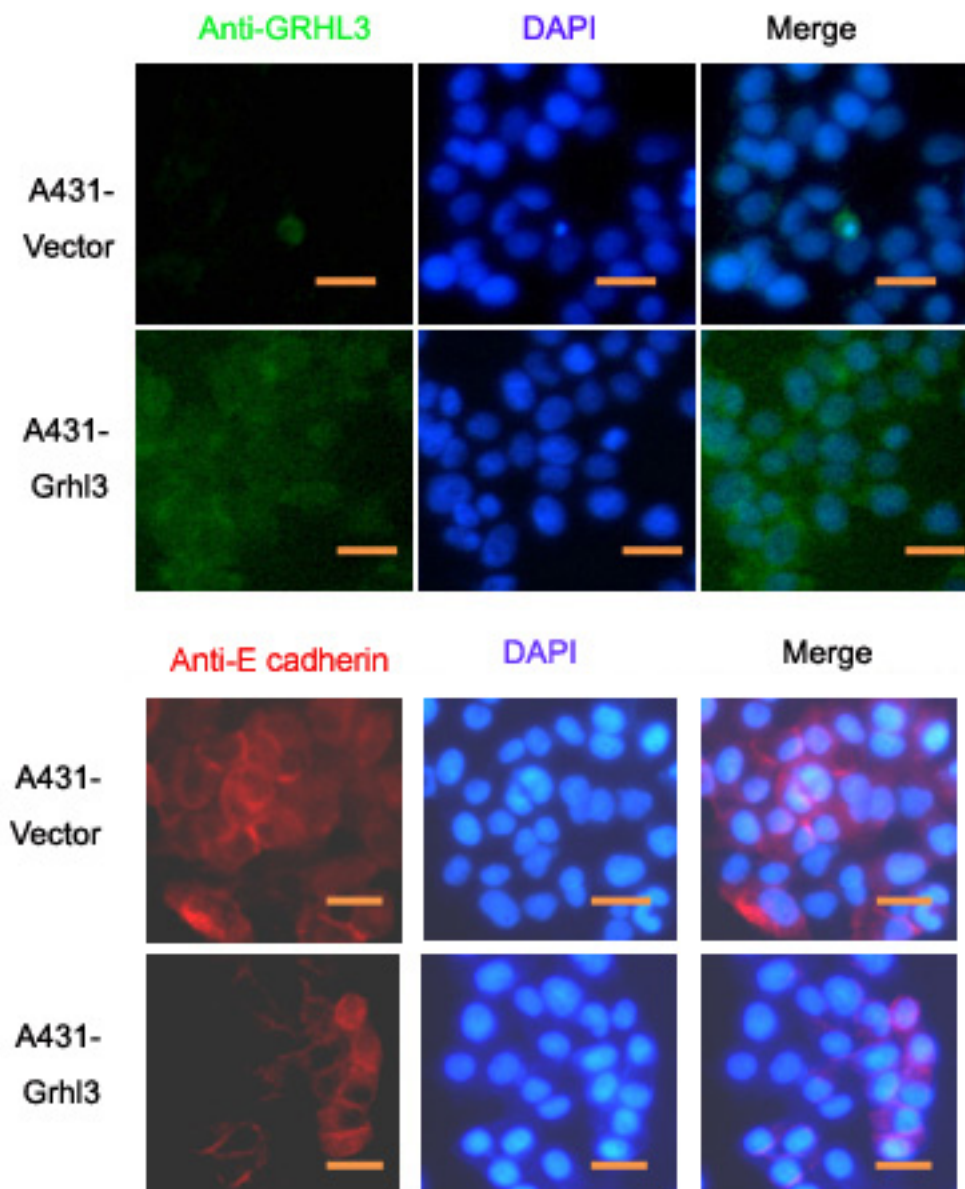

Immunofluorescence detection of Grhl3 and E-cadherin expression in A431 cells (scale bar-20  $\mu$ m).
